# Supplementary material for: Dibutyl Phthalate Adsorbed on Multiwalled Carbon Nanotubes Causes Fetal Developmental Toxicity in Balb/C Mice
Source: MDPI journal article supplement (doi:10.3390/toxics11070565), 2023-06-29
Supplement: s1 [file s1]

## CERTIFICATE OF ANALYSIS

PRODUCT NAME: Carbon nanotube, short multi-walled, 95%,OD: &lt; 8nm,Length:0.5 - 2um

ITEM NUMBER: C140996  
LOT NUMBER: H1810165  
BRAND: Aladdin  
CAS NUMBER: 308068-56-6  
MDL NUMBER:  
FORMULA:  
MOLECULAR WEIGHT:  
QUALITY RELEASE DATE: 2018-08-16 18:34:35  
RECOMMENDED RETESTED DATE: 2022-08-15 18:34:35

| TEST                  | SPECIFICATION              |                            | TARGET<br>VALUE                  | RESULT                              |
|-----------------------|----------------------------|----------------------------|----------------------------------|-------------------------------------|
|                       | MIN.                       | MAX.                       |                                  |                                     |
| Appearance            | black powder               |                            |                                  | black powder                        |
| ash                   | 0 %                        | 1.5 %                      | 1.5 %                            | 1.230000 %                          |
| Diameter              | 0 nm                       | 8 nm                       | 8 nm                             | 5.680000 nm                         |
| Length                | 0.5 $\mu$ m                | 2 $\mu$ m                  | 2 $\mu$ m                        | 1.620000 $\mu$ m                    |
| Purity                | 95 %                       | 100 %                      | 100 %                            | 95.000000 %                         |
| Specific surface area | 0 m <sup>2</sup> /gsurface | 0 m <sup>2</sup> /gsurface | >350<br>m <sup>2</sup> /gsurface | 361.000000 m <sup>2</sup> /gsurface |

Julian Xu

Shanghai ALADDIN Biochemical Technology Co.Ltd

Aladdin warrants, that at the time of the quality release or subsequent retest date this product conformed to the information contained in this publication. The current Specification sheet may be available at [www.aladdin-e.com](http://www.aladdin-e.com). For further inquiries, please contact Technical Service. Purchaser must determine the suitability of the product for its particular use. See reverse side of invoice or packing slip for additional terms and conditions of sale

VERSION NUMBER: 1
